# Supplementary material
Source: Springer Nature journal article supplement (https://www.springermedizin.de/resource/supplementary/12879_2008_846_MOESM1_ESM.pdf/9449912)

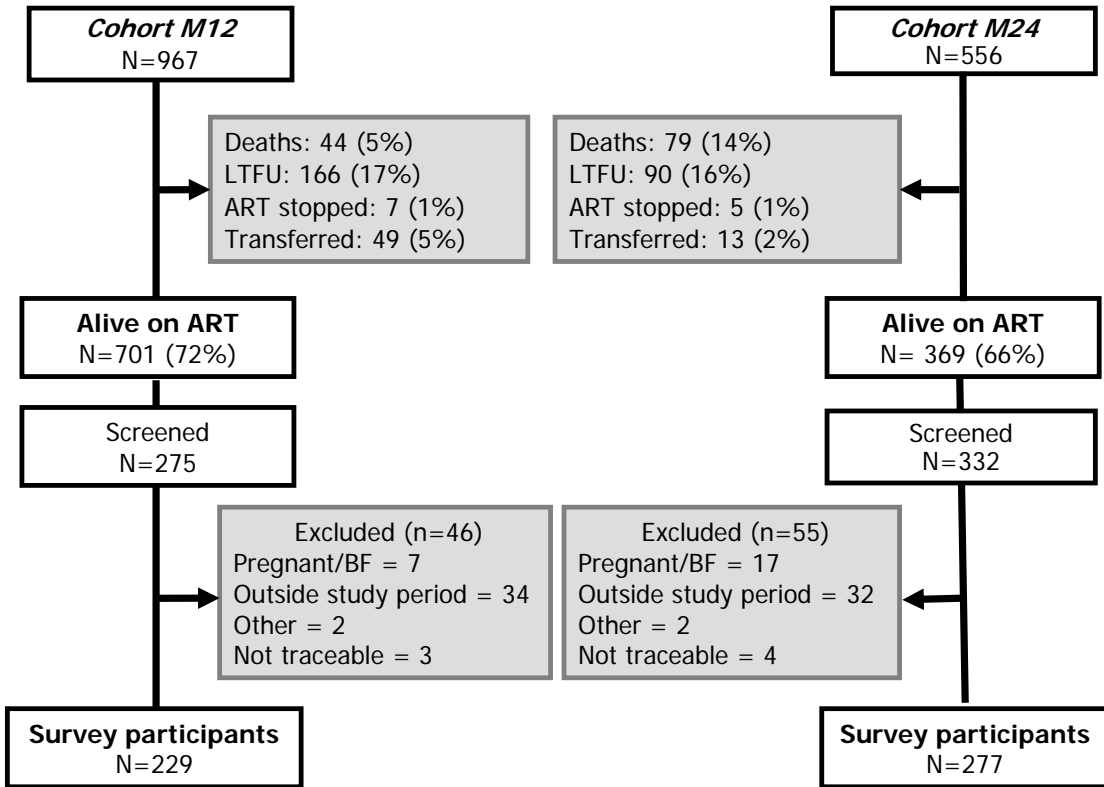

LTFU, lost to follow-up; ART, antiretroviral therapy; BF, breastfeeding

Supplement: MOESM1 [file 9449912]
